# Supplementary material
Source: PubMed Central journal article supplement (PMC2781081)
Supplement: tlo0204_0300SD1.pdf [file tlo0204_0300SD1.pdf]

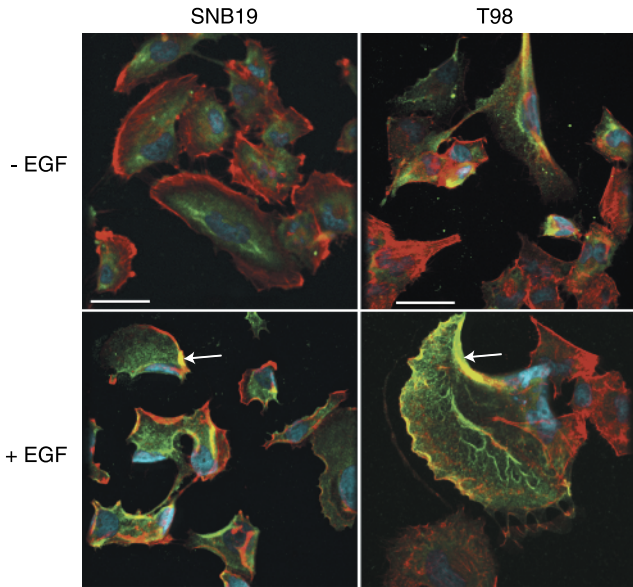

**Figure W1.** Characterization of SWAP-70 localization in glioma cell lines. Glioma cell lines T98 and SNB19 were either untreated or treated with EGF and characterized by immunofluorescence as in Figure 2.

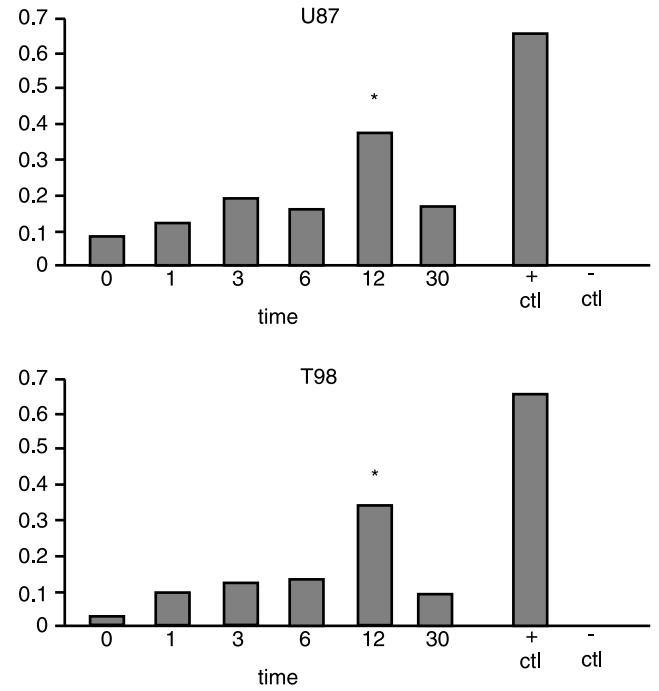

**Figure W2.** Optimization of Rac1 activation assay in glioma cell lines. Different time points of 0, 1, 3, 6, 12, and 30 minutes under EGF treatment were evaluated using GTP-Rac ELISA kit. U87 and T98 showed the maximal activation time point at 12 minutes after EGF treatment. Absorbance was measured at 490 nm.
